# Supplementary material for: Identification of a lipid homeostasis-related gene signature for predicting prognosis, immunity, and chemotherapeutic effect in patients with gastric cancer
Source: Springer Nature journal article supplement (doi:10.1038/s41598-024-52647-7), 2024-02-05
Supplement: MOESM1 [file 41598_2024_52647_MOESM1_ESM.pdf]

# Identification of a Lipid Homeostasis Related Genes Signature in Predicting the Prognosis, Immunity, and Chemotherapeutic Effect for Patients with Gastric Cancer

Chao Li<sup>1</sup>, Zhen Xiong<sup>1</sup>, Jinxin Han<sup>1</sup>, Weiqi Nian<sup>2</sup>, Zheng Wang<sup>1</sup>, Kailin Cai<sup>1</sup>, Jinbo Gao<sup>1</sup>, Guobin Wang<sup>1</sup>, Kaixiong Tao<sup>1</sup>, Ming Cai<sup>1\*</sup>

## Supplementary figure S1

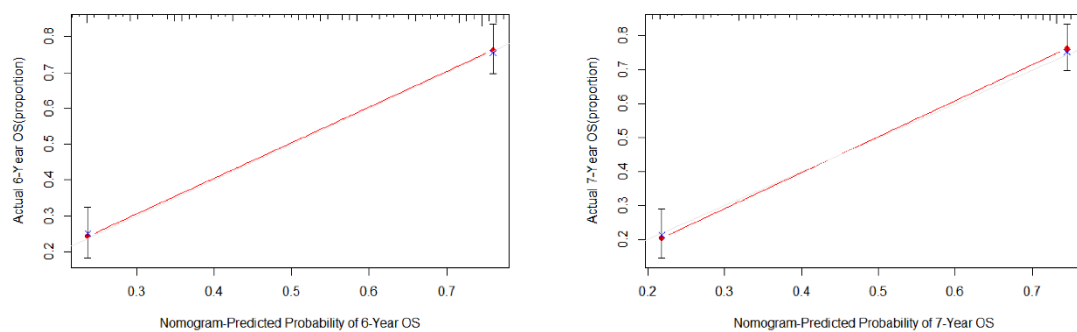

Calibration curves showed that the model performed well in predicting 6-year and 7-year survival in the TCGA-STAD cohort.
